# Supplementary material
Source: MDPI journal article supplement (https://www.mdpi.com/2072-4292/12/19/3166)
Supplement: s1 [file s1]

## Supplementary Materials:

The command syntax of drawing a trait dendrogram in R™

Step 1: load FD package

```
>library (FD)
```

Step2: set working directory

```
>setwd("F:/data folder")
```

Step 3: read the traits data

```
trait_breed<-  
read.csv("traits_breed_beta_20200915.csv",header =  
TRUE,row.names = "id",sep=",")
```

Step 4: calculate Gower distance matrix

```
> breed.dist<-gowdis(trait_breed)
```

Step 5: use hierarchical clustering by “average” method

```
> breed.dendro<-hclust(breed.dist,method = "average")
```

Step 6: plot the dendrogram

```
> plot(breed.dendro)
```

Table S1 Location, size, age and waterbody of sample parks

| Park                | Location                      | Size<br>(ha) | Age<br>(year) | Containing<br>waterbody |
|---------------------|-------------------------------|--------------|---------------|-------------------------|
| Beihai Park         | City center                   | 71           | 92            | Yes                     |
| Heaven Temple       | Inside 2nd ring road          | 270          | 99            | No                      |
| Beijing Zoo         | Between 2nd and 3rd ring road | 86           | 62            | Yes                     |
| Yuyuantan Park      | Between 2nd and 3rd ring road | 136          | 57            | Yes                     |
| Olympic Forest Park | Between 4th and 5th ring road | 350          | 9             | Yes                     |
| Summer Palace       | Between 4th and 5th ring road | 280          | 93            | Yes                     |
| Yuanmingyuan Park   | Between 4th and 5th ring road | 380          | 29            | Yes                     |

Table S2 Independent variables for statistical analysis

| Category          | Indicator                                                                                                                         | Formula                                                                                                                                                                                                                              |
|-------------------|-----------------------------------------------------------------------------------------------------------------------------------|--------------------------------------------------------------------------------------------------------------------------------------------------------------------------------------------------------------------------------------|
| Basic indicator   | Park size                                                                                                                         | Unit: hectare (ha.)                                                                                                                                                                                                                  |
|                   | Park age                                                                                                                          | Unit: year                                                                                                                                                                                                                           |
| Accessibility     | Number of bus stops                                                                                                               | The number of bus stops in 1km buffer out of park boundary                                                                                                                                                                           |
|                   | Number of subway stations                                                                                                         | The number of subway stations in 1km buffer out of park boundary                                                                                                                                                                     |
|                   | Neighbor road density (RD)                                                                                                        | $RD = \frac{\sum_{i=1}^n l_i}{A}$ $l_i$ = length of road i appeared in buffer.<br>A = area of 2km buffer out of park boundary (ha).                                                                                                  |
|                   | Distance to city center                                                                                                           | The straight-line distance from the center of the park to Tiananmen Square                                                                                                                                                           |
| Landscape pattern | Proportion of woodland, grassland, pavements and waterbody (PLAND_woodland, PLAND_grassland, PLAND_pavements and PLAND_waterbody) | $PLAND = P_i = \frac{\sum_{j=1}^n a_{ij}}{A} (100)$ $P_i$ = proportion of the landscape occupied by patch type (class) i.<br>$a_{ij}$ = area (m <sup>2</sup> ) of patch ij.<br>A = total landscape (or class) area (m <sup>2</sup> ) |
|                   | Patch density (PD)                                                                                                                | $PD = \frac{n_i}{A} (10,000) (100)$ $n_i$ = number of patches in the landscape of patch type (class) i.<br>A = total landscape area (m <sup>2</sup> )                                                                                |
|                   | Largest patch index (LPI)                                                                                                         | $LPI = \frac{\max_{j=1}^n (a_{ij})}{A}$ $a_{ij}$ = area (m <sup>2</sup> ) of patch ij.<br>A = total landscape area (m <sup>2</sup> ).                                                                                                |
|                   | Connectedness index (CONNECT)                                                                                                     | $CONNECT = \left[ \frac{\sum_{j \neq k}^n c_{ijk}}{\frac{n_i(n_i - 1)}{2}} \right] (100)$ $c_{ijk}$ = joining between patch j and k (0 = unjoined, 1 = joined) of the corresponding patch type                                       |

|                                                             |  |                                                                                                                                                                                                                                                                                                                                           |
|-------------------------------------------------------------|--|-------------------------------------------------------------------------------------------------------------------------------------------------------------------------------------------------------------------------------------------------------------------------------------------------------------------------------------------|
|                                                             |  | (i), based on a user specified threshold distance.<br>$n_i$ = number of patches in the landscape of the corresponding patch type (class)i.                                                                                                                                                                                                |
| Shannon's diversity index (SHDI)                            |  | $SHDI = - \sum_{i=1}^m (P_i \ln P_i)$ $P_i$ = proportion of the landscape occupied by patch type (class) i                                                                                                                                                                                                                                |
| Largest patch index (LPI) of woodland, grassland, pavements |  | $LPI = \frac{\sum_{j=1}^n \max(a_{ij})}{A}$ $a_{ij}$ = area ( $m^2$ ) of patch ij.<br>$A$ = total class area ( $m^2$ ).                                                                                                                                                                                                                   |
| Connectedness index (CONNECT) of woodland                   |  | $CONNECT = \left[ \frac{\sum_{j \neq k}^n c_{ijk}}{\frac{n_i(n_i - 1)}{2}} \right] (100)$ $c_{ijk}$ = joining between patch j and k (0 = unjoined, 1 = joined) of the corresponding patch type (i), based on a user specified threshold distance.<br>$n_i$ = number of patches in the landscape of the corresponding patch type (class)i. |
| Edge density (ED) of woodland and waterbody                 |  | $ED = \frac{\sum_{k=1}^m e_{ik}}{A} (10,000)$ $e_{ik}$ = total length (m) of edge in landscape involving patch type (class) i; includes landscape boundary and background segments involving patch type i.<br>$A$ = total class area ( $m^2$ ).                                                                                           |
| Patch density (PD) of building and pavements                |  | $PD = \frac{n_i}{A} (10,000) (100)$ $n_i$ = number of patches in the landscape of patch type (class) i.<br>$A$ = total landscape area ( $m^2$ )                                                                                                                                                                                           |
| Landscape shape index (LSI) of woodland and waterbody       |  | $LSI = \frac{0.25 \sum_{k=1}^m e_{ik}^*}{\sqrt{A}}$ $e_{ik}^*$ = total length (m) of edge in landscape between patch types (classes) i and k; includes the entire landscape boundary and some or all background edge segments                                                                                                             |

|  |  |                                                                   |
|--|--|-------------------------------------------------------------------|
|  |  | involving class i.<br>A = total landscape area (m <sup>2</sup> ). |
|--|--|-------------------------------------------------------------------|

Note: The indicators of Landscape composition refer to FRAGSTATS HELP (McGarigal 2014).

Table S3 Name list of breeding guilds

| Guild code | Guild name                                | Number of present sites | Species Latin name                                                                                                                                                                                                                                                                     | Species name                                                                                                                                                                                                                   |
|------------|-------------------------------------------|-------------------------|----------------------------------------------------------------------------------------------------------------------------------------------------------------------------------------------------------------------------------------------------------------------------------------|--------------------------------------------------------------------------------------------------------------------------------------------------------------------------------------------------------------------------------|
| 1          | Building-low level-rock hole nest         | 20                      | <i>Alcedo atthis</i><br><i>Halcyon pileata</i><br><i>Saxicola maurus</i><br><i>Phoenicurus aureus</i><br><i>Pardaliparus venustulus</i><br><i>Parus cinereus</i>                                                                                                                       | Common Kingfisher                                                                                                                                                                                                              |
| 2          | Building-shrub-under level rock open nest | 78                      | <i>Streptopelia chinesis</i>                                                                                                                                                                                                                                                           | Spotted Dove                                                                                                                                                                                                                   |
| 3          | Building-canopy hole nest                 | 158                     | <i>Passer montanus</i><br><i>Upupa epops</i><br><i>Acridotheres cristatellus</i><br><i>Spodiopsar cineraceus</i><br><i>Spodiopsar sericeus</i>                                                                                                                                         | Eurasian Tree Sparrow<br>Eurasian Hoopoe<br>Crested Myna<br>White-cheeked Starling<br>Silky Starling                                                                                                                           |
| 4          | Building-canopy open nest                 | 136                     | <i>Hirundo rustica</i><br><i>Cecropis daurica</i><br><i>Apus apus</i><br><i>Falco tinnunculus</i><br><i>Pica pica</i>                                                                                                                                                                  | Barn Swallow<br>Red-rumped Swallow<br>Common Swift<br>Common Kestrel<br>Common Magpie                                                                                                                                          |
| 5          | Mid-low level hole nest                   | 51                      | <i>Chloris sinica</i><br><i>Poecile palustris</i>                                                                                                                                                                                                                                      | Grey-capped Greenfinch<br>Marsh Tit                                                                                                                                                                                            |
| 6          | Shrub-mid level open nest                 | 81                      | <i>Streptopelia orientalis</i><br><i>Pycnonotus sinensis</i><br><i>Ardeola bacchus</i>                                                                                                                                                                                                 | Oriental Turtle Dove<br>Chinese Bulbul<br>Chinese Pond Heron                                                                                                                                                                   |
| 7          | Canopy nest                               | 41                      | <i>Aix galericulata</i><br><i>Nycticorax nycticorax</i><br><i>Corvus macrorhynchos</i><br><i>Corvus corone</i>                                                                                                                                                                         | Mandarin Duck<br>Black-crowned Night Heron<br>Large-billed Crow<br>Carion Crow                                                                                                                                                 |
| 8          | Canopy-mid level nest                     | 131                     | <i>Periparus ater</i><br><i>Sitta leucopsis</i><br><i>Dendrocopos major</i><br><i>Dendrocopos hyperythrus</i><br><i>Picus canus</i><br><i>Eophona migratoria</i><br><i>Urocissa flavirostris</i><br><i>Cyanopica cyanus</i><br><i>Turdus mandarinus</i><br><i>Dicrurus macrocercus</i> | Coal Tit<br>Chinese Nuthatch<br>Greater Spotted Woodpecker<br>Grey-capped Woodpecker<br>Grey-headed Woodpecker<br>Yellow-billed Grosbeak<br>Red-billed Blue Magpie<br>Azure-winged Magpie<br>Chinese Blackbird<br>Black Drongo |

|    |                              |    |                                                                                                                                                              |                                                                                                                              |
|----|------------------------------|----|--------------------------------------------------------------------------------------------------------------------------------------------------------------|------------------------------------------------------------------------------------------------------------------------------|
|    |                              |    | <i>Oriolus chinensis</i>                                                                                                                                     | Black-naped Oriole                                                                                                           |
| 9  | Shrub-low level<br>open nest | 25 | <i>Acrocephalus orientalis</i><br><i>Acrocephalus bistrigiceps</i><br><i>Sinosuthora webbiana</i><br><i>Phylloscopus fuscatus</i><br><i>Emberiza elegans</i> | Oriental Reed Warbler<br>Black-browed Reed Warbler<br>Vinous-throated Parrotbill<br>Dusky Warbler<br>Yellow-throated Bunting |
| 10 | Nest parasitism              | 15 | <i>Cuculus canorus</i>                                                                                                                                       | Common Cuckoo                                                                                                                |
| 11 | Water surface<br>open nest   | 5  | <i>Fulica atra</i><br><i>Podiceps auritus</i><br><i>Tachybaptus ruficollis</i><br><i>Sterna hirundo</i><br><i>Cuculus micropterus</i>                        | Common Coot<br>Horned Grebe<br>Little Grebe<br>Common Tern<br>Indian Cuckoo                                                  |
| 12 | Reed open nest               | 1  | <i>Ixobrychus sinensis</i><br><i>Ardea cinerea</i><br><i>Egretta garzetta</i><br><i>Anas zonorhyncha</i>                                                     | Yellow Bittern<br>Grey Heron<br>Little Egret<br>Chinese Spot-billed Duck                                                     |
| 13 | Reed-mid level<br>open nest  | 14 | <i>Anas platyrhynchos</i>                                                                                                                                    | Mallard                                                                                                                      |

Table S4 Correlation matrix of landscape index

|                                                       | Park size | PD      | LPI      | CONNECT  | SHDI     | PLAND_Woodland | PLAND_Building | PLAND_Pavements | PLAND_Waterbody | LPI_Woodland | LPI_Grass | LPI_Pavements | CONNECT_Woodland | ED_Waterbody | ED_Woodland | LSI_Waterbody | LSI_Woodland | PD_Woodland | PD_Building | PD_Pavements |
|-------------------------------------------------------|-----------|---------|----------|----------|----------|----------------|----------------|-----------------|-----------------|--------------|-----------|---------------|------------------|--------------|-------------|---------------|--------------|-------------|-------------|--------------|
| Park size                                             | 1         |         |          |          |          |                |                |                 |                 |              |           |               |                  |              |             |               |              |             |             |              |
| Patch density (PD)                                    | -0.231*   | 1       |          |          |          |                |                |                 |                 |              |           |               |                  |              |             |               |              |             |             |              |
| Largest patch index (LPI)                             | -0.382**  | -0.125  | 1        |          |          |                |                |                 |                 |              |           |               |                  |              |             |               |              |             |             |              |
| Connectedness index (CONNECT)                         | -0.409**  | 0.078   | 0.334**  | 1        |          |                |                |                 |                 |              |           |               |                  |              |             |               |              |             |             |              |
| Shannon’s diversity index (SHDI)                      | 0.306**   | 0.201*  | -0.753** | -0.291** | 1        |                |                |                 |                 |              |           |               |                  |              |             |               |              |             |             |              |
| Proportion of woodland (PLAND_Woodland)               | -0.095    | -0.174  | 0.406**  | 0.088    | -0.600** | 1              |                |                 |                 |              |           |               |                  |              |             |               |              |             |             |              |
| Proportion of building (PLAND_Building)               | -0.039    | 0.290** | -0.189   | -0.109   | 0.426**  | -0.223*        | 1              |                 |                 |              |           |               |                  |              |             |               |              |             |             |              |
| Proportion of Pavements (PLAND_Pavements)             | -0.111    | 0.164   | -0.417** | 0.115    | 0.506**  | -0.221*        | .330**         | 1               |                 |              |           |               |                  |              |             |               |              |             |             |              |
| Proportion of waterbody (PLAND_Waterbody)             | 0.306**   | -0.114  | -0.235*  | -0.220*  | 0.098    | 0.023          | -0.114         | -0.126          | 1               |              |           |               |                  |              |             |               |              |             |             |              |
| Largest patch index of woodland (LPI_Woodland)        | -0.261**  | -0.145  | 0.735**  | 0.213*   | -0.614** | 0.864**        | -0.134         | -0.255**        | -0.125          | 1            |           |               |                  |              |             |               |              |             |             |              |
| Largest patch index of grassland (LPI_Grass)          | -0.014    | -0.061  | -0.004   | 0.179    | 0.12     | -0.453**       | -0.026         | -0.106          | -0.17           | -.302*       | 1         |               |                  |              |             |               |              |             |             |              |
| Largest patch index of pavements (LPI_Pavements)      | -0.238*   | 0.179   | -0.178   | .374**   | .298**   | -0.175         | 0.151          | 0.788**         | -0.161          | -0.124       | -0.007    | 1             |                  |              |             |               |              |             |             |              |
| Connectedness index of woodland<br>(CONNECT_Woodland) | -0.354**  | 0.096   | 0.418**  | 0.705**  | -0.423** | 0.279**        | -0.126         | -0.16           | -0.167          | .376**       | 0.091     | 0.039         | 1                |              |             |               |              |             |             |              |
| Edge density of waterbody (ED_Waterbody)              | -0.011    | 0.124   | -0.302*  | 0.278*   | 0.334*   | -0.521**       | -0.132         | -0.048          | 0.126           | -.475**      | 0.217     | 0.068         | 0.103            | 1            |             |               |              |             |             |              |
| Edge density of woodland (ED_Woodland)                | -0.121    | 0.548** | -0.321** | 0.026    | 0.335**  | 0.242*         | 0.311**        | 0.462**         | 0.016           | 0.122        | -0.278    | 0.294**       | 0.032            | 0.012        | 1           |               |              |             |             |              |
| Landscape shape index of water body (LSI_Waterbody)   | 0.621**   | 0.031   | -0.430** | -0.408** | 0.301*   | -0.036         | 0.052          | -0.091          | 0.219           | -0.26        | -0.066    | -0.222        | -0.282*          | 0.287*       | 0.123       | 1             |              |             |             |              |
| Landscape shape index of woodland (LSI_Woodland)      | 0.861**   | -0.048  | -0.614** | -0.531** | 0.584**  | -0.217*        | 0.188          | 0.108           | 0.278**         | -.411**      | -0.013    | -0.164        | -0.488**         | 0.035        | 0.167       | 0.663**       | 1            |             |             |              |
| Patch density of woodland (PD_Woodland)               | -0.164    | 0.494** | -0.377** | 0.167    | 0.484**  | -0.272**       | .309**         | 0.724**         | -0.103          | -.277**      | -0.074    | 0.691**       | -0.125           | 0.093        | 0.536**     | -0.013        | 0.075        | 1           |             |              |
| Patch density of building (PD_Building)               | -0.201*   | 0.503** | -0.107   | 0.143    | 0.15     | -0.137         | 0.522**        | 0.195           | -0.179          | -0.122       | -0.045    | 0.233*        | 0.12             | -0.114       | 0.403**     | -0.141        | -0.071       |             | 1           |              |
| Patch density of pavements (PD_Pavements)             | -0.195*   | 0.976** | -0.081   | 0.044    | 0.152    | -0.129         | 0.257**        | 0.093           | -0.087          | -0.1         | -0.052    | 0.102         | 0.098            | 0.073        | 0.479**     | -0.002        | -0.046       |             | 0.419**     | 1            |

\*: p<0.05

\*\*.: p<0.01

Table S5 The variance inflation coefficient (VIF) of index in regression

|                                     | VIF (dependent variable=bird habitat area) | VIF (dependent variable=the number of birdwatching records) |
|-------------------------------------|--------------------------------------------|-------------------------------------------------------------|
| Park size                           | 47.999                                     | N/A                                                         |
| Distance to city center             | 226.919                                    | N/A                                                         |
| Number of bus stops                 | 18.511                                     | 12.903                                                      |
| Number of subway stations           | 30.101                                     | 5.892                                                       |
| Road density                        | 159.179                                    | 12.316                                                      |
| Proportion of woodland              | 152.769                                    | N/A                                                         |
| Proportion of building              | 91.513                                     | 6.738                                                       |
| Proportion of Pavements             | 19.493                                     | N/A                                                         |
| Proportion of waterbody             | 3.264                                      | 1.876                                                       |
| Patch density (PD)                  | 66.38                                      | 1.87                                                        |
| Largest patch index (LPI)           | 94.669                                     | 17.715                                                      |
| Connectedness index (CONNECT)       | 23.431                                     | 7.567                                                       |
| Shannon's diversity index (SHDI)    | 18.034                                     | N/A                                                         |
| Largest patch index of woodland     | 139.123                                    | 17.353                                                      |
| Largest patch index of grassland    | 4.294                                      | 5.879                                                       |
| Largest patch index of pavements    | 15.017                                     | 8.846                                                       |
| CONNECT_Woodland                    | 25.844                                     | N/A                                                         |
| Edge density of waterbody           | 22.158                                     | N/A                                                         |
| Edge density of woodland            | 70.733                                     | 6.943                                                       |
| Patch density of building           | 49.325                                     | 7.896                                                       |
| Patch density of pavements          | 64.891                                     | N/A                                                         |
| Landscape shape index of water body | 66.388                                     | N/A                                                         |
| Landscape shape index of woodland   | 39.683                                     | 10.441                                                      |



Table S6 The area under the curve (AUC) of each guild habitat assessment in MaxEnt model

| Guild code | Number of presence sites | Training AUC | Test AUC |
|------------|--------------------------|--------------|----------|
| 1          | 20                       | 0.87         | 0.71     |
| 2          | 78                       | 0.86         | 0.81     |
| 3          | 158                      | 0.89         | 0.82     |
| 4          | 136                      | 0.89         | 0.8      |
| 5          | 51                       | 0.87         | 0.81     |
| 6          | 81                       | 0.84         | 0.79     |
| 7          | 41                       | 0.92         | 0.85     |
| 8          | 131                      | 0.9          | 0.82     |
| 9          | 25                       | 0.92         | 0.85     |
| 10         | 15                       | 0.88         | 0.78     |
| 13         | 14                       | 0.82         | 0.75     |

Table S7 Parks with bird habitat of less than 1.6 ha

| Park name             | Habitat area (ha) | Park size (ha) |
|-----------------------|-------------------|----------------|
| Yuting Park           | 1.53              | 7.432777       |
| Fuhai Park            | 1.47              | 4.474344       |
| Beijiao Park          | 0.45              | 4.250326       |
| Fengtai Garden        | 0.27              | 7.7374         |
| Dongdan Park          | 0.27              | 4.533728       |
| Fengxuan Park         | 0.23              | 3.733408       |
| Changpuhe Park        | 0.23              | 2.657924       |
| Huaifang fishing Park | 0.18              | 6.745931       |
| Lidu Garden           | 0.09              | 7.674828       |
| Fengtai Park          | 0.09              | 6.46704        |
| Nanguan Park          | 0.09              | 2.817507       |
